# Supplementary material for: Molecular pathway and structural mechanism of human oncochannel TRPV6 inhibition by the phytocannabinoid tetrahydrocannabivarin
Source: Springer Nature journal article supplement (doi:10.1038/s41467-023-40362-2), 2023-08-02
Supplement: MOESM3 [file 41467_2023_40362_MOESM3_ESM.pdf]

## **Description of Additional Supplementary Files**

File name: Supplementary Data 1

Description: Coordinates of the protein obtained in MD simulations

File name: Supplementary Data 2

Description: Coordinates of the ligands obtained in MD simulations
